# Supplementary material for: Metabolic Evaluation of Synthetic Opioids on the Example of U-47700 with the Use of In Vitro and In Vivo Methods for Forensic Toxicology Application
Source: MDPI journal article supplement (doi:10.3390/toxics11030220), 2023-02-25
Supplement: s1 [file s1]

Table

Analytical parameters of the calibration equations for the determination of U-47700 and its major metabolites in biological tissues – liver, serum and brain (n = 5).

|                                 | Tissue | Concentration range<br>(ng/100 mg) | Regression equation | Correlation<br>coefficient<br>$R^2$ |
|---------------------------------|--------|------------------------------------|---------------------|-------------------------------------|
| U-47700                         | Serum  | 25 - 5000                          | $y=0.0018x-0.0334$  | 0.9987                              |
|                                 | Liver  |                                    | $y=0.0017x-0.0442$  | 0.9982                              |
|                                 | Brain  |                                    | $y=0.002x+0.034$    | 0.9994                              |
| N-desmethyl-<br>U-47700         | Serum  | 25 - 5000                          | $y=0.0012x+0.0071$  | 0.9979                              |
|                                 | Liver  |                                    | $y=0.0009x+0.1056$  | 0.9761                              |
|                                 | Brain  |                                    | $y=0.0013x+0.0454$  | 0.9957                              |
| N,N-<br>didesmethyl-<br>U-47700 | Serum  | 25 - 5000                          | $y=0.031x-1.1227$   | 0.9863                              |
|                                 | Liver  |                                    | $y=0.0293x-1.19$    | 0.9797                              |
|                                 | Brain  |                                    | $y=0.0245x+0.3201$  | 0.998                               |

Accuracy and precision for U-47700 and its major metabolites in biological tissues – liver, serum and brain samples.

| U-47700                 |                     | Concentration added | %R.S.D. |
|-------------------------|---------------------|---------------------|---------|
| Intraday (n = 4)        | Serum<br>(ng/100ml) | 25                  | 1.2     |
|                         |                     | 250                 | 2.2     |
|                         |                     | 5000                | 7.72    |
|                         | Liver<br>(ng/100mg) | 100                 | 6.33    |
|                         |                     | 500                 | 7.64    |
|                         |                     | 5000                | 4.88    |
|                         | Brain<br>(ng/100mg) | 25                  | 11.80   |
|                         |                     | 250                 | 1.23    |
|                         |                     | 5000                | 10.28   |
| N-desmethyl-U-47700     |                     |                     |         |
| Intraday (n = 4)        | Serum<br>(ng/100ml) | 25                  | 14.31   |
|                         |                     | 250                 | 3.47    |
|                         |                     | 5000                | 11.19   |
|                         | Liver<br>(ng/100mg) | 100                 | 8.98    |
|                         |                     | 500                 | 8.24    |
|                         |                     | 5000                | ---     |
|                         | Brain<br>(ng/100mg) | 25                  | 2.69    |
|                         |                     | 250                 | 10.02   |
|                         |                     | 5000                | ---     |
| N,N-didesmethyl-U-47700 |                     |                     |         |
| Intraday (n = 4)        | Serum<br>(ng/100ml) | 25                  | 14.19   |
|                         |                     | 250                 | 3.14    |
|                         |                     | 5000                | ---     |
|                         | Liver<br>(ng/100mg) | 100                 | 13.44   |
|                         |                     | 500                 | 9.40    |
|                         |                     | 5000                | ----    |
|                         | Brain<br>(ng/100mg) | 25                  | 9.69    |
|                         |                     | 250                 | 3.13    |
|                         |                     | 5000                | ----    |
